# Supplementary material for: Korean Hospital Nurses’ Experiences with COVID-19: A Meta-Synthesis of Qualitative Findings
Source: MDPI journal article supplement (doi:10.3390/healthcare12090903), 2024-04-26
Supplement: s1 [file s1]

### List of Articles Analyzed

- A1. Jin, D.R.; Lee, G.Y. Experiences of nurses at a general hospital in Seoul which is temporarily closed due to COVID-19. *J. Korean Acad. Soc. Nurs. Educ.* **2020**, *26*, 412–422. doi:10.5977/jkasne.2020.26.4.412.
- A2. Kim, M.Y.; Kim, S.S.; Sim, J.E. Overcoming experience of nurses caring for patients with COVID-19 in a hospital in Seoul. *J Korean Acad Nurs.* **2023**, *7*, 1, 77-87. Doi:10.34089/jknr.2023.7.1.77.
- A3. Kim, N.H.; Yang, Y.R.; Ahn, J.H. Nurses' experiences of care for patients in coronavirus disease 2019 infection wards during the early stages of the pandemic. *Korean J. Adult Nurs.* **2022**, *34*, 109–121. doi:10.7475/kjan.2022.34.1.109.
- A4. Oh, H.; Lee, N.K. A Phenomenological Study of the Lived Experience of Nurses Caring for Patients with COVID-19 in Korea. *J. Korean Acad. Nurs.* **2021**, *51*, 561–572. Doi:10.4040/jkan.21112.
- A5. Lee, H. J.; Lee, S. E.; Sang, S.; Morese, B. The lived experience of nurses who volunteered to combat the COVID-19 pandemic in South Korea: A qualitative phenomenological study. *J. Nurs. Manag.* **2002**, *30*, 4, 864-871. Doi:10.1111/jonm.13571.
- A6. Jang, H.-Y.; Yang, J.-E.; Shin, Y.-S. A Phenomenological Study of Nurses' Experience in Caring for COVID-19 Patients. *Int. J. Environ. Res. Public Health.* **2022**, *19*(5), 2924. <https://doi.org/10.3390/ijerph19052924>
- A7. Lee, J. Y.; Lee, S.; Choi, H.; Oh, E. G. Exploring the experiences of frontline nurses caring for COVID-19 patients. *Int. Nurs. Rev.* **2022**, *70*(1), 50–58. <https://doi.org/10.1111/inr.12801>.
- A8. Lee, J.H.; Song, Y. Nurses' Experiences of the COVID-19 Crisis. *J. Korean Acad. Nurs.* **2021**, *51*(6). <https://doi.org/10.4040/jkan.21160>.
- A9. Chung, S.; Seong, M.; Park, J. Nurses' Experience in COVID-19 Patient Care. *J. Korean Acad. Nurs. Adm.* **2022**, *28*(2), 142–153. <https://doi.org/10.1111/jkana.2022.28.2.142>
- A10. Noh, E.-Y.; Chai, Y.J.; Kim, H. J.; Kim, E.; Park, Y.-H. Nurses' Experience with Caring for COVID-19 Patients in a Negative Pressure Room Amid the Pandemic Situation. *J. Korean Acad. Nurs.* **2021**, *51*(5), 585–596. <https://doi.org/10.4040/jkan.21148>
- A11. Oh, I. O.; Yoon, S. J.; Nam, K. A. Working Experience of Nurses at a COVID-19 Dedicated Hospital. *Korean J. Adult Nurs.* **2021**, *33*(6), 657–669. <https://doi.org/10.7475/kjan.2021.33.6.657>
- A12. Shin, S.; Yoo, H.J. Frontline nurses' caring experiences in COVID-19 units: A qualitative study. *J. Nurs. Manage.* **2022**, *30*(5), 1087–1095. <https://doi.org/10.1111/jonm.13607>.
- A13. Je, N.J.; Lee, D.-Y.; Kwon, M.K.; Yoo, J.-E. A-Young Jo. Experience of Clinical Nurse's Bioethics Dilemma during the COVID-19. *J. Korea Convergence Society.* **2022**, *13*(3), 379-390. <https://doi.org/10.15207/JKCS.2022.13.03.379>
- A14. Park, J.P.; Choi, K.S. Experience of Nurses Working at the Drive-Thru COVID-19 Screening Clinic. *J Korean Acad Nurs Adm.* **2021**, *27*(4), 236–247. Doi: 10.11111/jkana.2021.27.4.236

- A15. Ha, B.Y.; Bae, Y.S.; Ryu, H.S.; Jeon, M.K. Experience of Nurses in Charge of COVID-19 Screening at General Hospitals in Korea. *J Korean Acad Nurs Adm.* **2022.** 52(1), 66–79. Doi:10.4040/jkan.21166
- A16. Choi, S.Y. Job stress experiences caused by COVID-19 related work of screening center nurses: For a tertiary hospital in Seoul. Master's Thesis, Yonsei University, Seoul, Republic of Korea, December 2021.
